# Supplementary material for: Repair-driven DNA tetrahedral nanomachine combined with DNAzyme for 8-oxo guanine DNA glycosylase activity assay, drug screening and intracellular imaging
Source: Royal Society of Chemistry journal article supplement (doi:10.1039/d3an01521a), 2023-12-01
Supplement: d3an01521a1.pdf [file d3an01521a1.pdf]

Electronic Supplementary Material

**Repaired-Driven DNA Tetrahedral Nanomachine Combined with  
DNAzyme for 8-oxo guanine DNA Glycosylase Activity Assay,  
Drug Screening and Intracellular Imaging.**

Yun Qiu<sup>1#</sup>, Bin Liu<sup>2#</sup>, Wenchao Zhou<sup>1</sup>, Xueqing Tao<sup>2</sup>, Yang Liu<sup>1</sup>, Linxi Mao<sup>1</sup>, Huizhen Wang<sup>1</sup>,

Hanwen Yuan<sup>1</sup>, Yupei Yang<sup>1</sup>, Bin Li<sup>1</sup>, Wei Wang<sup>1\*</sup> Yixing Qiu<sup>1\*\*</sup>

1. TCM and Ethnomedicine Innovation & Development International Laboratory, Academician  
Atta-ur-Rahman Belt and Road Traditional Medicine Research Center, School of Pharmacy, Hunan  
University of Chinese Medicine, Changsha 410208, China.

2. College of Biology, Hunan University, Changsha 410082, China.

#These authors contributed to the work equally and should be regarded as joint first authors

Correspondence to: Yixing Qiu, Wei Wang.

Dr. Yixing Qiu

E-mail address: qiuyixing@hnuem.edu.cn

School of Pharmacy, Hunan University of Chinese Medicine, Changsha 410208, China

Tel: +86 15674925204

Dr. Wei Wang

E-mail address: wangwei402@hotmail.com

School of Pharmacy, Hunan University of Chinese Medicine, Changsha 410208, China

Tel: +86136-5743-8606; Fax: +86731-88458227

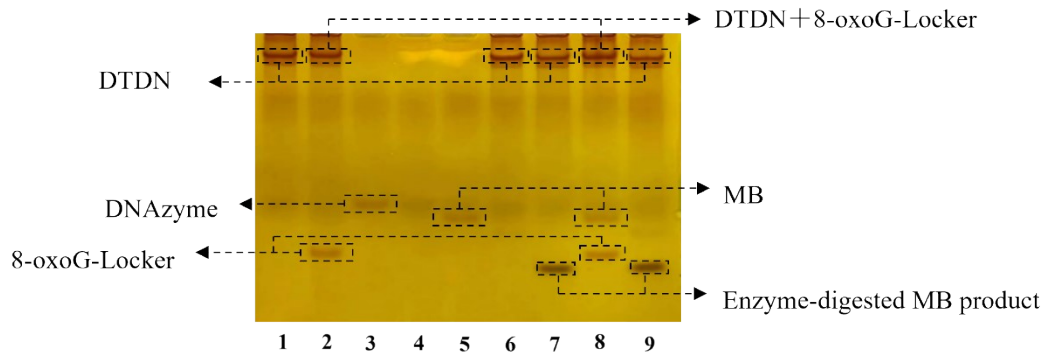

Fig.S1. Native PAGE gel (8%) for the 8oxoG-DNA glycosylase assay. Lane 1: DTDN; Lane 2: DTDN+ 8-oxoG-Locker; Lane 3: DNAzyme; Lane 4: DNAzyme+MB; Lane 5: MB; Lane 6: DTDN+MB; Lane 7: DTDN+8-oxoG-Locker+ 8-oxoG DNA glycosylase; Lane 8: DTDN+ 8-oxoG-Locker +MB; Lane 9: DTDN+ 8-oxoG-Locker +MB + 8-oxoG-DNA glycosylase; [L1] = [DZ-L2] = [L3] = [L4] = 100 nM, [8-oxoG-Locker] = 150 nM, [MB] = 100 nM, [8-oxoG-DNA glycosylase] = 80 U/mL.

Table S1. The sequences of oligonucleotide strands

| Name                 | Sequences (5'-3')                                                                                             |
|----------------------|---------------------------------------------------------------------------------------------------------------|
| <b>L1</b>            | ATTATCACCCGCCATAGTAGACGTATCACCAGGCAGTTGAGACGAACATTCCCTAAGTCTGAA                                               |
| <b>DZ-L2</b>         | CATCTCTTCTCCGAGCCGGTCGAAATAGTTGGTTTTTTTTACATGCGAGGGTCCAATACCGACGA<br>TTACAGCTTGCTACACGATTACAGACTTAGGAATGTTTCG |
| <b>L3</b>            | ACTACTATGGCGGGTGATAAAAACGTGTAGCAAGCTGTAATCGACGGGAAGAGCATGCCCATC<br>C                                          |
| <b>L4</b>            | ACGGTATTGGACCCTCGCATGACTCAACTGCCTGGTGATACGAGGATGGGCATGCTCTTCCCG                                               |
| <b>8-oxoG-Locker</b> | CGACCG8oxoGCTCGG8oxoGAAGAGA                                                                                   |
| <b>MB</b>            | FAM-CCACCACTACCAACTAT(A)rGGAAGAGATGTTGTGGTGG-BHQ1                                                             |
| <b>DNAzyme</b>       | CATCTCTTCTCCGAGCCGGTCGAAATAGTTGGT                                                                             |

Table S2. The composition and pH of buffers for the enzymes

| Enzyme     | Buffer (1×)                                                             | pH (25°C) |
|------------|-------------------------------------------------------------------------|-----------|
| Fpg        | 10 mM Bis Tris propane-HCl, 10 mM MgCl <sub>2</sub> , 1mM DTT, 100µg/mL | 7.0       |
|            | BSA                                                                     |           |
| T4         | 50 mM Tris-HCl, 10 mM MgCl <sub>2</sub> , 1 mM ATP, 10 mM DTT           | pH 7.5    |
| DNA Ligase |                                                                         |           |
| UDG        | 20 mM Tris-HCl, 1 mM EDTA, 1 mM DTT                                     | 8.0       |
| hAAG       | 10 mM Tris-HCl, 100 mM KCl, 1 mM DTT, 0.1 mM EDTA, 50%                  | pH 7.4    |
|            | Glycerol                                                                |           |
|            | 0.5% Tween® 20, 0.5% IGEPAL® CA-630                                     |           |
| APE1       | 50 mM KAc, 20 mM Tris-Ac, 10 mM Mg (Ac) <sub>2</sub> , 1 mM DTT         | 7.9       |

Table S3. The detailed information of 14 natural compounds.

| Code | Compound Name                      | Molecular formula    | Structure                                                                            |
|------|------------------------------------|----------------------|--------------------------------------------------------------------------------------|
| a    | Chikusetsusaponin IV               | $C_{47}H_{74}O_{18}$ | 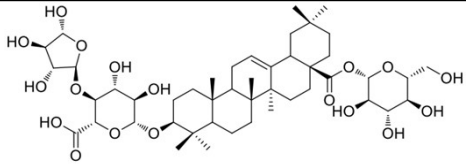   |
| b    | Chikusetsusaponin IVa              | $C_{42}H_{66}O_{14}$ |    |
| c    | Chikusetsusaponin IV methyl ester  | $C_{48}H_{76}O_{18}$ |   |
| d    | Ginsenoside Rg1                    | $C_{42}H_{72}O_{14}$ |  |
| e    | Chikusetsusaponin IVa methyl ester | $C_{43}H_{68}O_{14}$ |  |

|   |                                  |                      |                                                                                      |
|---|----------------------------------|----------------------|--------------------------------------------------------------------------------------|
| f | Chikusetsusaponin V methyl ester | $C_{49}H_{78}O_{19}$ | 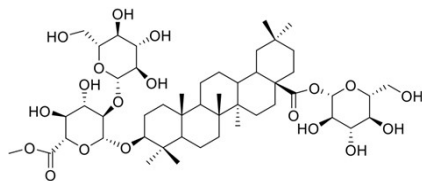   |
| g | Ginsenoside Rg2                  | $C_{42}H_{72}O_{13}$ |    |
| h | Ginsenoside F1                   | $C_{36}H_{62}O_9$    |   |
| i | Ginsenoside Rd                   | $C_{48}H_{82}O_{18}$ |  |
| j | Ginsenoside Rh1                  | $C_{36}H_{62}O_9$    |  |
| k | Ginsenoside Rh4                  | $C_{36}H_{60}O_8$    |  |

---

|   |                                    |                      |                                                                                                                                                                                                                                                                                                                                                                                                                                                                                                                                                                                        |
|---|------------------------------------|----------------------|----------------------------------------------------------------------------------------------------------------------------------------------------------------------------------------------------------------------------------------------------------------------------------------------------------------------------------------------------------------------------------------------------------------------------------------------------------------------------------------------------------------------------------------------------------------------------------------|
| l | Notoginsenoside R1                 | $C_{47}H_{80}O_{18}$ | 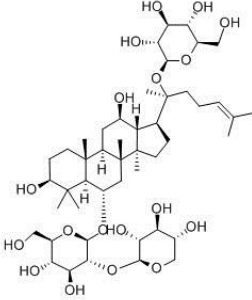 <p>The structure of Notoginsenoside R1 is a complex pentacyclic triterpene. It features a central core with multiple methyl groups and hydroxyl groups. Attached to the core are two sugar moieties: a rhamnose unit at the C-20 position and a glucose unit at the C-3 position. The rhamnose unit is linked via an ether bridge, and the glucose unit is linked via an ester bridge.</p>                                                                                                          |
| m | Pseudoginsenoside RT1 methyl ester | $C_{48}H_{76}O_{18}$ |  <p>The structure of Pseudoginsenoside RT1 methyl ester is a complex pentacyclic triterpene. It features a central core with multiple methyl groups and hydroxyl groups. Attached to the core are two sugar moieties: a rhamnose unit at the C-20 position and a glucose unit at the C-3 position. The rhamnose unit is linked via an ether bridge, and the glucose unit is linked via an ester bridge. The structure is similar to Notoginsenoside R1 but with a different sugar configuration.</p> |
| n | Ginsenoside Rg3                    | $C_{42}H_{72}O_{13}$ |  <p>The structure of Ginsenoside Rg3 is a complex pentacyclic triterpene. It features a central core with multiple methyl groups and hydroxyl groups. Attached to the core are two sugar moieties: a rhamnose unit at the C-20 position and a glucose unit at the C-3 position. The rhamnose unit is linked via an ether bridge, and the glucose unit is linked via an ester bridge. The structure is similar to Notoginsenoside R1 but with a different sugar configuration.</p>                    |

---

Table S4. The comparison of the presented work with other reported works for detecting 8-oxoG DNA glycosylase activity.

| Analytical method                                                               | Signal            | Detection limit | Material synthesis time | Reaction step | Reaction time | Application                                                | Reference |
|---------------------------------------------------------------------------------|-------------------|-----------------|-------------------------|---------------|---------------|------------------------------------------------------------|-----------|
| DNAzyme and rGO based biosensor                                                 | Fluorescence      | 0.66 U/mL       | 5h                      | 3             | 170min        | Activity assay, drug screening, and bacterial imaging      | 1         |
| Closing-upon-repair DNA tetrahedron nanoswitch                                  | Fluorescence      | 0.3653 U/mL     | 160min                  | 1             | 90min         | Intracellular                                              | 2         |
| Pyrrolo-dC modified duplex DNA probe                                            | Fluorescence      | 1.25 U/mL       | 25min                   | 1             | 60min         | Activity assay                                             | 3         |
| DNAzyme-mediated cascade amplification platform                                 | Fluorescence      | 0.14 U/mL       | /                       | 2             | 155min        | Activity assay, drug screening, and serum sample analysis  | 4         |
| Target-induced self-primed rolling circle amplification and magnetic nanoprobes | Fluorescence      | 1.033 U/mL      | /                       | 5             | 5.75h         | Activity assay and diluted human serum assay               | 5         |
| Enzyme-catalytic cleavage reaction of DNA substrate                             | Nanopore analysis | 0.01 U/mL       | 20min                   | 2             | 135min        | Cellular hOGG1 Activity                                    | 6         |
| Repaired-driven three-dimensional DNA nanomachine combining with DNAzyme        | Fluorescence      | 0.52 U/mL       | 45min                   | 2             | 155min        | Activity Assay, Drug Screening, and Intracellular Imaging. | This work |

## References

1. Y. Qiu, W. Dang, J. Fan, T. Zhou, B. Li, Y. Liu, Y. Qin, C. Tong, M. Daniyal and W. Wang, *Talanta*, 2020, 218, 121158.
2. Y. Wu, M. Wu, M. Liu, D. Wang, L. Wang, T. Weng and J. Han, *Anal. Chim. Acta*, 2022, 1196,

339481.

3. C. Y. Lee, K. S. Park and H. G. Park, *Biosens. Bioelectron.*, 2017, 98, 210-214.
4. W. Dang, C. Tong, Y. Yang, Y. Liu, B. Liu, H. Zhou and W. Wang, *Analyst*, 2019, 144, 1731-1740.
5. J. Song, F. Yin, X. Li, N. Dong, Y. Zhu, Y. Shao, B. Chen, W. Jiang and C.-z. Li, *Analyst*, 2018, 143, 1593-1598.
6. J. Shang, Z. Li, L. Liu, D. Xi and H. Wang, *ACS Sens.*, 2018, 3, 512-518.
