# Supplementary figures and images for: Repair-driven DNA tetrahedral nanomachine combined with DNAzyme for 8-oxo guanine DNA glycosylase activity assay, drug screening and intracellular imaging
Source: Royal Society of Chemistry journal article supplement (doi:10.1039/d3an01521a), 2023-12-01

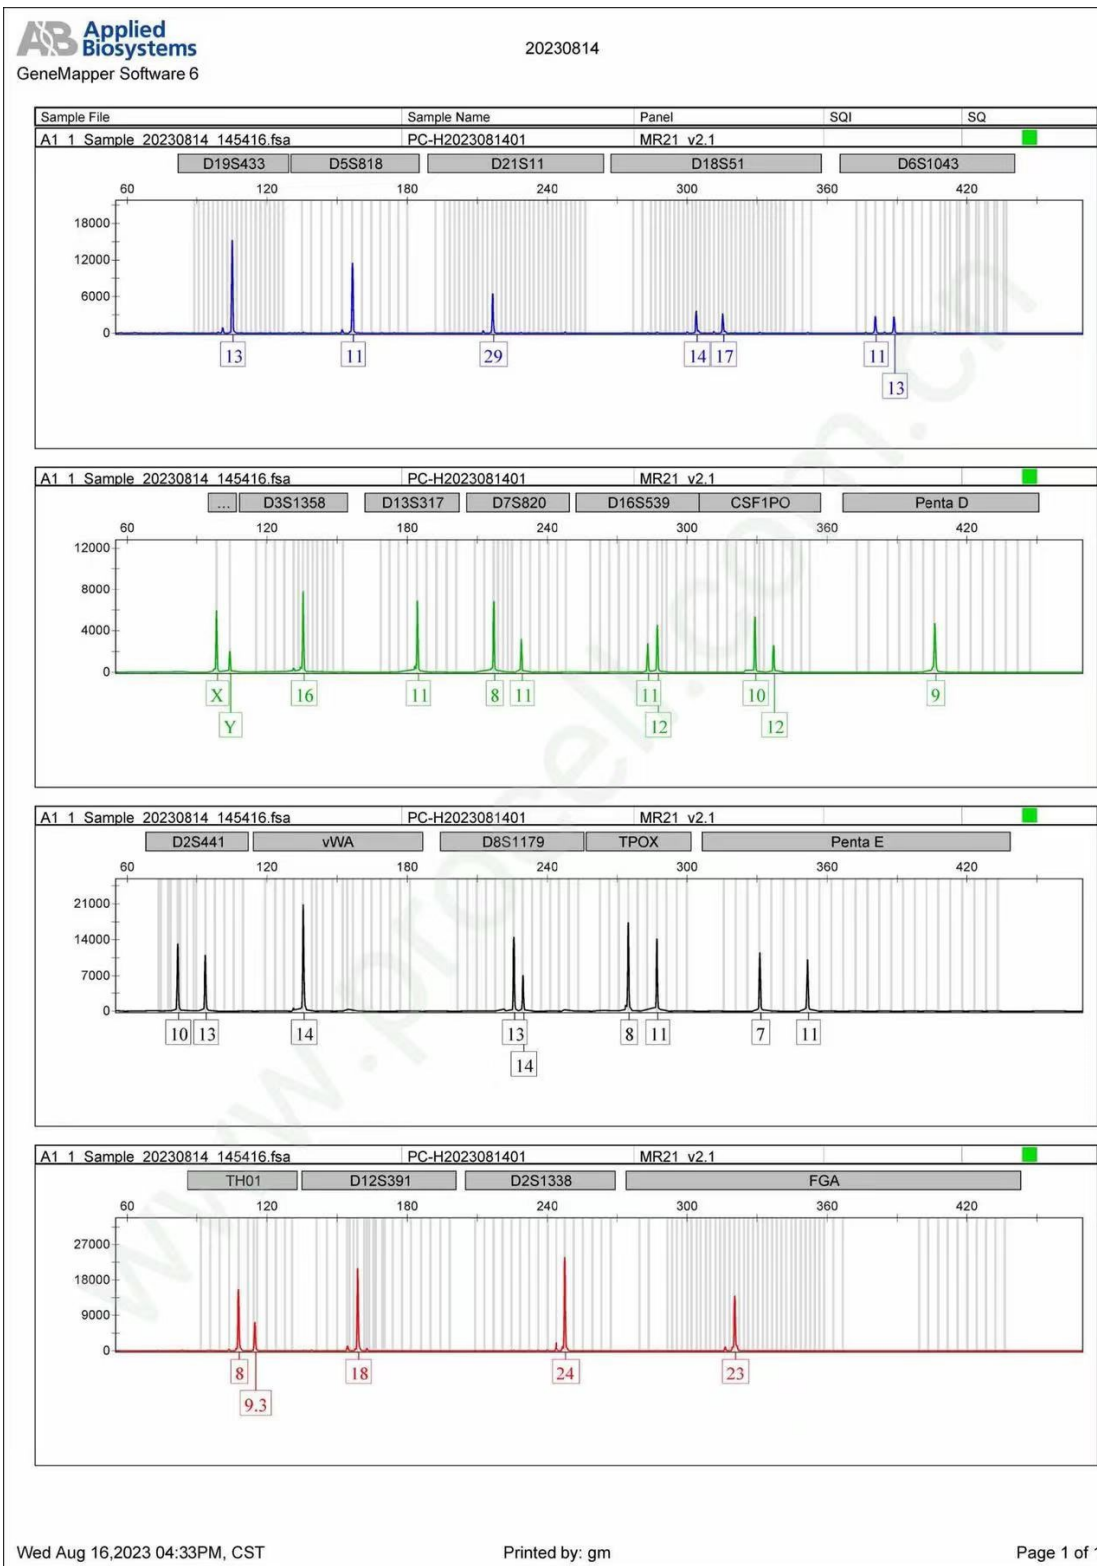

Figure 1: STR identification of A549 cell

Supplement: d3an01521a2.pdf [file d3an01521a2.pdf]
